# Supplementary material for: Immune Response to COVID-19 Vaccination in Frontline Healthcare Workers
Source: MDPI journal article supplement (doi:10.3390/vaccines12020199), 2024-02-15
Supplement: s1 [file s1]

## Supplementary Materials

**Table S1.** Distribution of respondents according to comorbidities and specific conditions.

| Comorbidities and specific conditions        | Distribution of respondents according to comorbidities and specific conditions |            | Comparison of the number of respondents with comorbidities and specific conditions who had COVID-19 after vaccination |             |
|----------------------------------------------|--------------------------------------------------------------------------------|------------|-----------------------------------------------------------------------------------------------------------------------|-------------|
|                                              | N                                                                              | %          | N                                                                                                                     | %           |
| Oncological disease                          | 9                                                                              | 5.3        | 3                                                                                                                     | 33.3        |
| Autoimmune disease                           | 32                                                                             | 18.7       | 15                                                                                                                    | 46.9        |
| Asthma                                       | 12                                                                             | 7.0        | 8                                                                                                                     | 66.7        |
| Chronic kidney disease (CKD)                 | 3                                                                              | 1.8        | 0                                                                                                                     | 0.0         |
| Primary arterial hypertension (PAH)          | 82                                                                             | 48.0       | 45                                                                                                                    | 54.9        |
| Chemotherapy                                 | 3                                                                              | 1.8        | 0                                                                                                                     | 0.0         |
| Long-term treatment with glucocorticoids     | 1                                                                              | 0.6        | 0                                                                                                                     | 0.0         |
| Oncohematological disease                    | 1                                                                              | 0.6        | 1                                                                                                                     | 100         |
| Type 2 CD                                    | 10                                                                             | 5.8        | 4                                                                                                                     | 40.0        |
| Chronic obstructive pulmonary disease (COPD) | 3                                                                              | 1.8        | 0                                                                                                                     | 0.0         |
| Heart failure                                | 6                                                                              | 3.5        | 3                                                                                                                     | 50.0        |
| Pregnancy                                    | 4                                                                              | 2.3        | 2                                                                                                                     | 50.0        |
| Biological therapy                           | 3                                                                              | 1.8        | 2                                                                                                                     | 66.7        |
| Posttransplant immunosuppression             | 2                                                                              | 1.2        | 0                                                                                                                     | 0.0         |
| <b>Total</b>                                 | <b>171</b>                                                                     | <b>100</b> | <b>83</b>                                                                                                             | <b>48.5</b> |

**Table S2.** Study participants with comorbidities and specific conditions who developed COVID-19.

| Number of comorbidities and specific conditions | Number of study participants | Detected SARS-CoV-2 | Not-detected SARS-CoV-2 |
|-------------------------------------------------|------------------------------|---------------------|-------------------------|
| 0                                               | 400 (74.9%)                  | 206 (74.4%)         | 194 (75.5%)             |
| 1                                               | 110 (20.6%)                  | 62 (22.4%)          | 48 (18.7%)              |
| 2                                               | 16 (3.0%)                    | 5 (1.8%)            | 11 (4.2%)               |
| 3                                               | 7 (1.3%)                     | 3 (1.0%)            | 4 (1.6%)                |
| 5                                               | 1 (0.2%)                     | 1 (0.4%)            | 0 (0%)                  |
| <b>Total</b>                                    | <b>534 (100%)</b>            | <b>277 (100%)</b>   | <b>257 (100%)</b>       |

**Table S3.** Participants with comorbidities and specific conditions and level of antibodies after 6 months of receiving the vaccination with full vaccination schedule (two doses).

| Ab groups                                                   |       |         |         |               |               |                   |                   |                   |     | Total |
|-------------------------------------------------------------|-------|---------|---------|---------------|---------------|-------------------|-------------------|-------------------|-----|-------|
| I                                                           | II    | III     | IV      | V             | VI            | VII               | VIII              | IX                |     |       |
| 1–49                                                        | 50–99 | 100–499 | 500–999 | 1000–<br>4999 | 5000–<br>9999 | 10 000–<br>19 999 | 20 000–<br>29 999 | 30 000–<br>40 000 |     |       |
| Total number of participants, who came for Ab investigation |       |         |         |               |               |                   |                   |                   |     |       |
| 0                                                           | 2     | 109     | 168     | 218           | 11            | 4                 | 1                 | 1                 | 514 |       |

|                                                                          |       |      |       |       |       |       |      |      |      |      |
|--------------------------------------------------------------------------|-------|------|-------|-------|-------|-------|------|------|------|------|
|                                                                          | 0.0 % | 0.4% | 21.2% | 32.7% | 42.4% | 2.1%  | 0.8% | 0.2% | 0.2% | 100% |
| <b>Number of participants with comorbidities and specific conditions</b> |       |      |       |       |       |       |      |      |      |      |
| Primary arterial hypertension (PAH)                                      | 0     | 0    | 28    | 31    | 22    | 0     | 0    | 0    | 0    | 81   |
|                                                                          | 0.0%  | 0.0% | 34.6% | 38.3% | 27.2% | 0.0%  | 0.0% | 0.0% | 0.0% | 100% |
| Heart failure                                                            | 0     | 0    | 4     | 1     | 1     | 0     | 0    | 0    | 0    | 6    |
|                                                                          | 0.0%  | 0.0% | 66.7% | 16.7% | 16.7% | 0.0%  | 0.0% | 0.0% | 0.0% | 100% |
| Oncological disease                                                      | 0     | 0    | 2     | 4     | 3     | 0     | 0    | 0    | 0    | 9    |
|                                                                          | 0.0%  | 0.0% | 22.2% | 44.4% | 33.3% | 0.0%  | 0.0% | 0.0% | 0.0% | 100% |
| Oncohematological disease                                                | 0     | 0    | 0     | 0     | 1     | 0     | 0    | 0    | 0    | 1    |
|                                                                          | 0.0%  | 0.0% | 0.0%  | 0.0%  | 100%  | 0.0%  | 0.0% | 0.0% | 0.0% | 100% |
| Autoimmune disease                                                       | 0     | 0    | 9     | 9     | 12    | 0     | 0    | 0    | 0    | 30   |
|                                                                          | 0.0%  | 0.0% | 30.0% | 30.0% | 40.0% | 0.0%  | 0.0% | 0.0% | 0.0% | 100% |
| Type 2 CD                                                                | 0     | 0    | 6     | 2     | 0     | 2     | 0    | 0    | 0    | 10   |
|                                                                          | 0.0 % | 0.0% | 60.0% | 20.0% | 0.0%  | 20.0% | 0.0% | 0.0% | 0.0% | 100% |
| Asthma                                                                   | 0     | 1    | 0     | 1     | 10    | 0     | 0    | 0    | 0    | 12   |
|                                                                          | 0.0%  | 8.3% | 0.0%  | 8.3%  | 83.3% | 0.0%  | 0.0% | 0.0% | 0.0% | 100% |
| Chronic obstructive pulmonary disease (COPD)                             | 0     | 0    | 2     | 1     | 0     | 0     | 0    | 0    | 0    | 3    |
|                                                                          | 0.0%  | 0.0% | 66.7% | 33.3% | 0.0%  | 0.0%  | 0.0% | 0.0% | 0.0% | 100% |
| Chronic kidney disease (CKD)                                             | 0     | 0    | 2     | 0     | 1     | 0     | 0    | 0    | 0    | 3    |
|                                                                          | 0.0%  | 0.0% | 66.7% | 0.0%  | 33.3% | 0.0%  | 0.0% | 0.0% | 0.0% | 100% |
| Pregnancy                                                                | 0     | 0    | 0     | 0     | 4     | 0     | 0    | 0    | 0    | 4    |
|                                                                          | 0.0%  | 0.0% | 0.0%  | 0.0%  | 100%  | 0.0%  | 0.0% | 0.0% | 0.0% | 100% |
| Biological therapy                                                       | 0     | 0    | 0     | 2     | 1     | 0     | 0    | 0    | 0    | 3    |
|                                                                          | 0.0%  | 0.0% | 0.0%  | 66.7% | 33.3% | 0.0%  | 0.0% | 0.0% | 0.0% | 100% |
| Long-term treatment with glucocorticoids                                 | 0     | 0    | 0     | 1     | 0     | 0     | 0    | 0    | 0    | 1    |
|                                                                          | 0.0%  | 0.0% | 0.0%  | 100%  | 0.0%  | 0.0%  | 0.0% | 0.0% | 0.0% | 100% |
| Posttransplant immunosuppression                                         | 0     | 0    | 1     | 1     | 0     | 0     | 0    | 0    | 0    | 2    |
|                                                                          | 0.0%  | 0.0% | 50.0% | 50.0% | 0.0%  | 0.0%  | 0.0% | 0.0% | 0.0% | 100% |
| Total                                                                    | 0     | 1    | 54    | 53    | 55    | 2     | 0    | 0    | 0    | 165  |
|                                                                          | 0.0%  | 0.6% | 32.7% | 32.1% | 33.3% | 1.2%  | 0    | 0    | 0    | 100% |

**Table S4.** Participants with comorbidities and specific conditions, and the level of antibodies after 3 months of receiving the vaccination with booster dose.

|                                                                             | <b>Ab groups</b> |       |         |         |           |           |               |               |               | <b>Total</b> |
|-----------------------------------------------------------------------------|------------------|-------|---------|---------|-----------|-----------|---------------|---------------|---------------|--------------|
|                                                                             | I                | II    | III     | IV      | V         | VI        | VII           | VIII          | IX            |              |
|                                                                             | 1–49             | 50–99 | 100–499 | 500–999 | 1000–4999 | 5000–9999 | 10 000–19 999 | 20 000–29 999 | 30 000–40 000 |              |
| <b>Total number of research participants, who came for Ab investigation</b> |                  |       |         |         |           |           |               |               |               |              |
|                                                                             | 0                | 0     | 2       | 3       | 128       | 132       | 115           | 49            | 45            | 474          |
|                                                                             | 0.0%             | 0.0%  | 0.4%    | 0.6%    | 27.0%     | 27.8%     | 24.3%         | 10.3%         | 9.5%          | 100%         |
| <b>Number of participants with comorbidities and specific conditions</b>    |                  |       |         |         |           |           |               |               |               |              |
| Primary arterial hypertension (PAH)                                         | 0                | 0     | 1       | 0       | 23        | 16        | 15            | 10            | 6             | 71           |
|                                                                             | 0.0%             | 0.0%  | 1.4%    | 0.0%    | 32.4%     | 22.5%     | 21.1%         | 14.1%         | 8.5%          | 100%         |
| Heart failure                                                               | 0                | 0     | 0       | 0       | 2         | 2         | 0             | 1             | 0             | 5            |
|                                                                             | 0.0%             | 0.0%  | 0.0%    | 0.0%    | 40.0%     | 40.0%     | 0.0%          | 20.0%         | 0.0%          | 100%         |
| Oncological disease                                                         | 0                | 0     | 0       | 0       | 3         | 1         | 3             | 0             | 2             | 9            |
|                                                                             | 0.0%             | 0.0%  | 0.0%    | 0.0%    | 33.3%     | 11.1%     | 33.3%         | 0.0%          | 22.2%         | 100%         |
| Oncohematological disease                                                   | 0                | 0     | 0       | 0       | 0         | 0         | 1             | 0             | 0             | 1            |
|                                                                             | 0.0%             | 0.0%  | 0.0%    | 0.0%    | 0.0%      | 0.0%      | 100%          | 0.0%          | 0.0%          | 100%         |
| Autoimmune disease                                                          | 0                | 0     | 0       | 0       | 11        | 8         | 6             | 1             | 1             | 27           |

|                                                    |      |      |       |      |       |       |       |       |       |      |
|----------------------------------------------------|------|------|-------|------|-------|-------|-------|-------|-------|------|
|                                                    | 0.0% | 0.0% | 0.0%  | 0.0% | 40.7% | 29.6% | 22.2% | 3.7%  | 3.7%  | 100% |
| Type 2 diabetes                                    | 0    | 0    | 1     | 0    | 5     | 1     | 1     | 1     | 1     | 10   |
|                                                    | 0.0% | 0.0% | 10.0% | 0.0% | 50.0% | 10.0% | 10.0% | 10.0% | 10.0% | 100% |
| Asthma                                             | 0    | 0    | 0     | 0    | 3     | 3     | 3     | 2     | 1     | 12   |
|                                                    | 0.0% | 0.0% | 0.0%  | 0.0% | 25.0% | 25.0% | 25.0% | 16.7% | 8.3%  | 100% |
| Chronic obstructive<br>pulmonary disease<br>(COPD) | 0    | 0    | 0     | 0    | 1     | 1     | 1     | 0     | 0     | 3    |
|                                                    | 0.0% | 0.0% | 0.0%  | 0.0% | 33.3% | 33.3% | 33.3% | 0.0%  | 0.0%  | 100% |
| Chronic kidney<br>disease (CKD)                    | 0    | 0    | 0     | 0    | 1     | 0     | 1     | 0     | 1     | 3    |
|                                                    | 0.0% | 0.0% | 0.0%  | 0.0% | 33.3% | 0.0%  | 33.3% | 0.0%  | 33.3% | 100% |
| Pregnancy                                          | 0    | 0    | 0     | 0    | 1     | 1     | 2     | 0     | 0     | 4    |
|                                                    | 0.0% | 0.0% | 0.0%  | 0.0% | 25.0% | 25.0% | 50.0% | 0.0%  | 0.0%  | 100% |
| Biological therapy                                 | 0    | 0    | 0     | 0    | 1     | 1     | 0     | 0     | 0     | 2    |
|                                                    | 0.0% | 0.0% | 0.0%  | 0.0% | 50.0% | 50.0% | 0.0%  | 0.0%  | 0.0%  | 100% |
| Long-term treatment<br>with glucocorticoids        | 0    | 0    | 0     | 0    | 1     | 0     | 0     | 0     | 0     | 1    |
|                                                    | 0.0% | 0.0% | 0.0%  | 0.0% | 100%  | 0.0%  | 0.0%  | 0.0%  | 0.0%  | 100% |
| Posttransplant<br>immunosuppression                | 0    | 0    | 0     | 0    | 2     | 0     | 0     | 0     | 0     | 2    |
|                                                    | 0.0% | 0.0  | 0.0%  | 0.0% | 100%  | 0.0%  | 0.0%  | 0.0%  | 0.0%  | 100% |
| Total                                              | 0    | 0    | 2     | 0    | 54    | 34    | 33    | 15    | 12    | 150  |
|                                                    | 0.0% | 0.0% | 1.3%  | 0.0% | 36.0% | 22.7% | 22.0% | 10.0% | 8.0%  | 100% |
